# Supplementary material for: The global burden of scabies: a cross-sectional analysis from the Global Burden of Disease Study 2015
Source: PubMed Central journal article supplement (PMC5700804; doi:10.1016/s1473-3099(17)30483-8), 2017-12
Supplement: mmc1.pdf [file mmc1.pdf]

# THE LANCET Infectious Diseases

## Supplementary webappendix

This webappendix formed part of the original submission and has been peer reviewed. We post it as supplied by the authors.

Supplement to: Karimkhani C, Colombara DV, Drucke AM, et al. The global burden of scabies: a cross-sectional analysis from the Global Burden of Disease Study 2015. *Lancet Infect Dis* 2016; published online September 20. [http://dx.doi.org/10.1016/S1473-3099\(17\)30483-8](http://dx.doi.org/10.1016/S1473-3099(17)30483-8).

| Citation                                                                                                                                                                                                                                                | Country of origin                         | Year(s) of publication | Details of diagnosis                                                                                                                                                                         |
|---------------------------------------------------------------------------------------------------------------------------------------------------------------------------------------------------------------------------------------------------------|-------------------------------------------|------------------------|----------------------------------------------------------------------------------------------------------------------------------------------------------------------------------------------|
| Paek SY, Koriakos A, Saxton-Daniels S, Pandya AG. Skin diseases in rural Yucatan, Mexico. <i>Int J Dermatol</i> 2012; <b>51</b> : 823–8.                                                                                                                | Yucatan                                   | 2009-2010              | Dermatologic consultations performed by team of American board-certified dermatologists                                                                                                      |
| Frese T, Herrmann K, Sandholzer H. Pruritus as Reason for Encounter in General Practice. <i>J Clin Med Res</i> 2011; <b>3</b> : 223–9.                                                                                                                  | Germany                                   | 1999-2000              |                                                                                                                                                                                              |
| Fung WK, Lo KK. Prevalence of skin disease among school children and adolescents in a Student Health Service Center in Hong Kong. <i>Pediatr Dermatol</i> 2000; <b>17</b> : 440–6.                                                                      | Hong Kong Special Administration of China | 1996-1997              |                                                                                                                                                                                              |
| Perera A, Atukorale DN, Sivayogan S, Ariyaratne VS, Karunaratne LDA. Prevalence of skin diseases in suburban Sri Lanka. <i>Ceylon Med J</i> 2000; <b>45</b> : 123–8.                                                                                    | Sri Lanka                                 | 1997                   |                                                                                                                                                                                              |
| Walker SL, Shah M, Hubbard VG, Pradhan HM, Ghimire M. Skin disease is common in rural Nepal: results of a point prevalence study. <i>Br J Dermatol</i> 2008; <b>158</b> : 334–8.                                                                        | Nepal                                     | 2006                   |                                                                                                                                                                                              |
| Popescu R, Popescu CM, Williams HC, Forsea D. The prevalence of skin conditions in Romanian school children. <i>Br J Dermatol</i> 1999; <b>140</b> : 891–6.                                                                                             | Romania                                   | 1995                   |                                                                                                                                                                                              |
| Gibbs, S. Skin disease and socioeconomic conditions in rural Africa: Tanzania. <i>Int J Dermatol</i> 1996; <b>35</b> : 633–9.                                                                                                                           | Tanzania                                  | 1993-1995              |                                                                                                                                                                                              |
| Al-Rubiay KK, Al-Rubaiy LK. Dermatoepidemiology: A Household Survey Among Two Urban Areas In Basrah City, Iraq. <i>The Internet Journal of Dermatology</i> 2006; <b>4</b> : 10.                                                                         | Iraq                                      | 2005                   |                                                                                                                                                                                              |
| Ogunbiyi AO, Omigbodun Y, Owoaje E. Prevalence of skin disorders in school children in southwest Nigeria. <i>Int J Adolesc Med Health</i> 2009; <b>21</b> : 235–41.                                                                                     | Nigeria                                   | 2002-2004, 2006-2008   | One dermatologist and three registrars in dermatology unit carried out the physical examinations                                                                                             |
| Feré J, Dinkela A, Mbata M, Idindili B, Schmid-Grendelmeier P, Hatz C. Skin disorders among school children in rural Tanzania and an assessment of therapeutic needs. <i>Trop Doct</i> 2006; <b>36</b> : 219–21.                                        | Tanzania                                  | 2003                   |                                                                                                                                                                                              |
| Schmeller W, Dzikus A. Skin diseases in children in rural Kenya: long-term results of a dermatology project within the primary health care system. <i>Br J Dermatol</i> 2001; <b>144</b> : 118–24.                                                      | Kenya                                     | 1993, 1999             |                                                                                                                                                                                              |
| Oyedeji O, Okeniyi J, Ogunlesi T, Onayemi O, Oyedeji G, Oyelami O. Parental factors influencing the prevalence of skin infections and infestations among Nigerian primary school pupils. <i>The Internet Journal of Dermatology</i> 2006; <b>3</b> : 6. | Nigeria                                   | 2003                   |                                                                                                                                                                                              |
| Komba EV, Mgonda YM. The spectrum of dermatological disorders among primary school children in Dar es Salaam. <i>BMC Public Health</i> 2010; <b>10</b> : 765.                                                                                           | Tanzania                                  | 2007-2009              | Diagnosis made mainly clinically, laboratory investigations used to confirm difficult diagnoses, specimens obtained from burrows of suspected scabies lesions for direct microscopy of mites |
| Grover S, Ranyal RK, Bedi MK. A cross section of skin diseases in rural Allahabad. <i>Indian J Dermatol</i> 2008; <b>53</b> : 179–81.                                                                                                                   | India                                     | 2005                   |                                                                                                                                                                                              |
| Abdel-Hafez K, Abdel-Aty MA, Hofny ERM. Prevalence of skin diseases in rural areas of Assiut Governorate, Upper Egypt. <i>Int J Dermatol</i> 2003; <b>42</b> : 887–92.                                                                                  | Egypt                                     | 1994-1996              |                                                                                                                                                                                              |
| Leekassa R, Bizuneh E, Alem A, Fekadu A, Shibre T. Community                                                                                                                                                                                            | Ethiopia                                  | 1998                   |                                                                                                                                                                                              |

|                                                                                                                                                                                                                                                                   |                |           |                                                                                                                                           |
|-------------------------------------------------------------------------------------------------------------------------------------------------------------------------------------------------------------------------------------------------------------------|----------------|-----------|-------------------------------------------------------------------------------------------------------------------------------------------|
| diagnosis of common skin diseases in the Zay community of the Zeway Islands, Ethiopia. <i>Ethiop Med J</i> 2005; <b>43</b> : 189–95.                                                                                                                              |                |           |                                                                                                                                           |
| Chen G-Y, Cheng Y-W, Wang C-Y, Hsu T-J, Hsu MM-L, Yang P-T, Chen W-C. Prevalence of skin diseases among schoolchildren in Magong, Penghu, Taiwan: a community-based clinical survey. <i>J Formos Med Assoc</i> 2008; <b>107</b> : 21–9.                           | Taiwan         | 2005      |                                                                                                                                           |
| Henderson CA. Skin disease in rural Tanzania. <i>Int J Dermatol</i> 1996; <b>35</b> : 640–2.                                                                                                                                                                      | Tanzania       | 1991      |                                                                                                                                           |
| Hay RJ, Castanon RE, Hernandez HA, Lopez GC, Fuentes LF, Solis SP, Andersson N. Wastage of family income on skin disease in Mexico. <i>BMJ</i> 1994; <b>309</b> : 848.                                                                                            | Mexico         | 1993      | Survey and outpatient clinic visits                                                                                                       |
| Bechelli LM, Haddad N, Pimenta WP, Pagnano PM, Melchior E Jr, Fregnan RC, Zanin LC, Arenas A. Epidemiological survey of skin diseases in schoolchildren living in the Purus Valley (Acre State, Amazonia, Brazil). <i>Dermatologica</i> 1981; <b>163</b> : 78–93. | Brazil         | 1974-1975 |                                                                                                                                           |
| Lee J, Koh D, Andijani M, Saw SM, Munoz C, Chia SE, Wong ML, Hong CY, Ong CN. Effluents from a pulp and paper mill: a skin and health survey of children living in upstream and downstream villages. <i>Occup Environ Med</i> 2002; <b>59</b> : 373–9.            | Indonesia      | 1999      |                                                                                                                                           |
| Ali J, Yifru S, Woldeamanuel Y. Prevalence of tinea capitis and the causative agent among school children in Gondar, North West Ethiopia. <i>Ethiop Med J</i> 2011; <b>47</b> : 261–9.                                                                            | Ethiopia       | 2007-2008 |                                                                                                                                           |
| Woldeamanuel Y, Leekassa R, Chryssanthou E, Menghistu Y, Petrini B. Prevalence of tinea capitis in Ethiopian schoolchildren. <i>Mycoses</i> 2005; <b>48</b> : 137–41.                                                                                             | Ethiopia       | 2003-2005 |                                                                                                                                           |
| Mahé A, Prual A, Konaté M, Bobin P. Skin diseases of children in Mali: a public health problem. <i>Trans R Soc Trop Med Hyg</i> 1995; <b>89</b> : 467–70.                                                                                                         | Mali           | 1993-1994 |                                                                                                                                           |
| Heukelbach J, Wilcke T, Winter B, Feldmeier H. Epidemiology and morbidity of scabies and pediculosis capitis in resource-poor communities in Brazil. <i>Br J Dermatol</i> 2005; <b>153</b> : 150–6.                                                               | Brazil         | 2001      |                                                                                                                                           |
| Pannell RS, Fleming DM, Cross KW. The incidence of molluscum contagiosum, scabies and lichen planus. <i>Epidemiol Infect</i> 2005; <b>133</b> : 985–91.                                                                                                           | United Kingdom | 1994-2003 |                                                                                                                                           |
| Patel JK, Vyas AP, Berman B, Vierra M. Incidence of childhood dermatosis in India. <i>Skinmed</i> 2010; <b>8</b> : 136–42.                                                                                                                                        | India          | 2000-2002 | Diagnosis made based on a detailed review of history, clinical features, complete physical examination including skin and necessary tests |
| Libu GK, Bina T, Raphael L, Balakrishnan SE, Biju G, Samson JF, Bindu V. Prevalence and socio-demographic determinants of skin disease among lower primary school children in Calicut, Kerala. <i>IMAKMJ</i> 2010; 185–90.                                        | India          | 2006      |                                                                                                                                           |
| Emodi IJ, Ikefuna AN, Uchendu U, Duru A. Skin diseases among children attending the out patient clinic of the University of Nigeria teaching hospital, Enug. <i>Afr Health Sci</i> 2010; <b>10</b> .                                                              | Nigeria        | 1996-2005 |                                                                                                                                           |
| Wu YH, Su HY, Hsieh YJ. Survey of infectious skin diseases and skin infestations among primary school students of Taitung County, eastern Taiwan. <i>J Formos Med Assoc</i> 2000; <b>99</b> : 128–34.                                                             | Taiwan         | 1998      |                                                                                                                                           |
| Dagnew MB, Günther E. Epidemiology of communicable skin diseases in school children of a rural area in North Ethiopia. <i>Dermatol Monatsschr</i> 1990; <b>176</b> : 219–23.                                                                                      | Ethiopia       | 1989      |                                                                                                                                           |
| Steer AC, Jenney AWJ, Kado J, Batzloff MR, La Vincente S, Waqatakirewa L, Mulholland EK, Carapetis JR. High burden of                                                                                                                                             | Fiji           | 2006-2007 | Children examined for clinical presence of                                                                                                |

|                                                                                                                                                                                                                                                  |                |                  |                                                                                                                                                                                                                                                                                                                                                                                                                                                                                                                                                                                                                                                                                                                                                                                                                                                                                                                                                                                                                                                                                                                                                                                                                                                                                                                           |
|--------------------------------------------------------------------------------------------------------------------------------------------------------------------------------------------------------------------------------------------------|----------------|------------------|---------------------------------------------------------------------------------------------------------------------------------------------------------------------------------------------------------------------------------------------------------------------------------------------------------------------------------------------------------------------------------------------------------------------------------------------------------------------------------------------------------------------------------------------------------------------------------------------------------------------------------------------------------------------------------------------------------------------------------------------------------------------------------------------------------------------------------------------------------------------------------------------------------------------------------------------------------------------------------------------------------------------------------------------------------------------------------------------------------------------------------------------------------------------------------------------------------------------------------------------------------------------------------------------------------------------------|
| <p>impetigo and scabies in a tropical country. <i>PLoS Negl Trop Dis</i> 2009; <b>3</b>: e467.</p>                                                                                                                                               |                |                  | <p>impetigo and scabies with the initial examination restricted to the arms legs head and neck to avoid embarrassment, any children with severe scabies or impetigo also had exam of abdomen and back; no exam of buttocks/groin/chest except infants in whom scabies and impetigo lesions are often present in atypical areas, research staff trained in dermatologic clinical examination including the clinical diagnosis of impetigo and scabies and supervised by paediatrician, active impetigo defined as any crusted ulcer or vesiculopustular skin eruption, old impetigo defined as any dry skin lesion, active impetigo classified as mild (less than five lesions) moderate (between five and 20 lesions) or severe (more than 20 lesions), where microbiologic data was available a case of GAS impetigo was defined as a child with one or more active impetigo lesions from which GAS was grown from culture of at least one lesion; Staphylococcus aureus impetigo defined similarly when S. aureus was cultured, scabies defined on basis of typical clinical findings (inflammatory papules with typical distribution that were pruritic) without use of microscopy or dermoscopy, scabies lesions classified according to presence of bacterial superinfection (i.e. scabies or infected scabies).</p> |
| <p>Kramkimel N, Soussan V, Beauchet A, Duhamel A, Saiag P, Chevallier B, Mahé E. High frequency, diversity and severity of skin diseases in a paediatric emergency department. <i>J Eur Acad Dermatol Venereol</i> 2010; <b>24</b>: 1468–75.</p> | <p>France</p>  | <p>2006</p>      |                                                                                                                                                                                                                                                                                                                                                                                                                                                                                                                                                                                                                                                                                                                                                                                                                                                                                                                                                                                                                                                                                                                                                                                                                                                                                                                           |
| <p>Ibragimov SI. The structure of skin pathology in middle-aged and</p>                                                                                                                                                                          | <p>Romania</p> | <p>1989-1990</p> |                                                                                                                                                                                                                                                                                                                                                                                                                                                                                                                                                                                                                                                                                                                                                                                                                                                                                                                                                                                                                                                                                                                                                                                                                                                                                                                           |

|                                                                                                                                                                                                                                                                                                                                |                 |      |                                                                                                                                                                                                                                                                                                                                                                           |
|--------------------------------------------------------------------------------------------------------------------------------------------------------------------------------------------------------------------------------------------------------------------------------------------------------------------------------|-----------------|------|---------------------------------------------------------------------------------------------------------------------------------------------------------------------------------------------------------------------------------------------------------------------------------------------------------------------------------------------------------------------------|
| elderly subjects. <i>Vestn Dermatol Venerol</i> 1990; <b>2</b> : 37–40.                                                                                                                                                                                                                                                        |                 |      |                                                                                                                                                                                                                                                                                                                                                                           |
| Eason RJ, Tasman-Jones T. Resurgent yaws and other skin diseases in the Western Province of the Solomon Islands. <i>P N G Med J</i> 1985; <b>28</b> : 247–50.                                                                                                                                                                  | Solomon Islands | 1984 |                                                                                                                                                                                                                                                                                                                                                                           |
| Harris M, Nako D, Hopkins T, Powell DM, Kenny C, Carroll C, Carroll K. Skin infections in Tanna, Vanuatu in 1989. <i>P N G Med J</i> 1992; <b>35</b> : 137–43.                                                                                                                                                                 | Vanuatu         | 1989 |                                                                                                                                                                                                                                                                                                                                                                           |
| Feldmeier H, Jackson A, Ariza L, Calheiros CML, Soares V de L, Oliveira FA, Hengge UR, Heukelbach J. The epidemiology of scabies in an impoverished community in rural Brazil: presence and severity of disease are associated with poor living conditions and illiteracy. <i>J Am Acad Dermatol</i> 2009; <b>60</b> : 436–43. | Brazil          | 2003 | Household leaders asked for room with good light and guaranteed privacy, whole body including the breasts and genital area thoroughly examined for presence of skin lesions typical for scabies, children <10 years only examined in presence of caretaker (mother), diagnosis of scabies made clinically after well-established and approved methods in developing world |
| Grills N, Grills C, Spelman T, Stoope M, Hellard M, El-Hayek C, Singh R. Prevalence survey of dermatological conditions in mountainous north India. <i>Int J Dermatol</i> 2012; <b>51</b> : 579–87.                                                                                                                            | India           | 2010 | Determined by two medical practitioners including trained dermatologist through dermatological history and examination of present family members                                                                                                                                                                                                                          |
| Dos Santos MM, Amaral S, Harmen SP, Joseph HM, Fernandes JL, Counahan ML. The prevalence of common skin infections in four districts in Timor-Leste: a cross sectional survey. <i>BMC Infect Dis</i> 2010; <b>61</b> .                                                                                                         | Timor-Leste     | 2007 | Clinical presentation in absence of skin scrapings used for scabies, all unknown conditions were photographed and examined by staff at SPHTMRS for confirmatory diagnosis                                                                                                                                                                                                 |
| Steer AC, Tikoduadua LV, Manalac EM, Colquhoun S, Carapetis JR, MacLennan C. Validation of an Integrated Management of Childhood Illness algorithm for managing common skin conditions in Fiji. <i>Bull World Health Organ</i> 2009; <b>87</b> : 173–9.                                                                        | Fiji            | 2007 | Nurse asked parent if their child had skin problem, then proceeded to examine child's skin from head to toe, standard procedure for child to be properly exposed for most aspects of the IMCI guidelines so full skin exam does not cause child further embarrassment                                                                                                     |
| National Center for Health Statistics (NCHS), Centers for Disease Control and Prevention (CDC), United States Census Bureau. United States National Ambulatory Medical Care Survey 1993 and United States National Hospital Ambulatory Medical Care Survey 1993.                                                               | United States   | 1993 |                                                                                                                                                                                                                                                                                                                                                                           |
| National Center for Health Statistics (NCHS), Centers for Disease Control and Prevention (CDC), United States Census Bureau. United States National Ambulatory Medical Care Survey 1994 and United States National Hospital Ambulatory Medical Care Survey 1994.                                                               | United States   | 1994 |                                                                                                                                                                                                                                                                                                                                                                           |



|                                                                                                                                                                                                                                                                                           |               |           |                                                    |
|-------------------------------------------------------------------------------------------------------------------------------------------------------------------------------------------------------------------------------------------------------------------------------------------|---------------|-----------|----------------------------------------------------|
| National Center for Health Statistics (NCHS), Centers for Disease Control and Prevention (CDC), United States Census Bureau. United States National Ambulatory Medical Care Survey 2008 and United States National Hospital Ambulatory Medical Care Survey 2008.                          | United States | 2008      |                                                    |
| National Center for Health Statistics (NCHS), Centers for Disease Control and Prevention (CDC), United States Census Bureau. United States National Ambulatory Medical Care Survey 2009 and United States National Hospital Ambulatory Medical Care Survey 2009.                          | United States | 2009      |                                                    |
| National Center for Health Statistics (NCHS), Centers for Disease Control and Prevention (CDC), SRA International, Inc., United States Census Bureau. United States National Hospital Ambulatory Medical Care Survey 2010 and United States National Ambulatory Medical Care Survey 2010. | United States | 2010      |                                                    |
| Hogewoning A, Amoah A, Bavinck JNB, Boakye D, Yazdanbakhsh M, Adegnika A, De Smedt S, Fonteyne Y, Willemze R, Lavrijsen A. Skin diseases among schoolchildren in Ghana, Gabon, and Rwanda. <i>Int J Dermatol</i> 2013; <b>52</b> : 589–600.                                               | Ghana         | 2007      | Physical examination by at least one dermatologist |
| Clucas DB, Carville KS, Connors C, Currie BJ, Carapetis JR, Andrews RM. Disease burden and health-care clinic attendances for young children in remote aboriginal communities of northern Australia. <i>Bull World Health Organ</i> 2008; <b>86</b> : 275–81.                             | Australia     | 2002-2005 | Review of medical records                          |
| Lapeere H, Naeyaert J-M, De Weert J, De Maeseneer J, Brochez L. Incidence of scabies in Belgium. <i>Epidemiol Infect</i> 2008; <b>136</b> : 395–8.                                                                                                                                        | Belgium       | 2004      | Review of medical records                          |
| Amro A, Hamarsheh O. Epidemiology of scabies in the West Bank, Palestinian Territories (Occupied). <i>Int J Infect Dis</i> 2012; <b>16</b> : e117–20.                                                                                                                                     | Palestine     | 2005-2010 | Dermatologist diagnosis                            |
| US Hospital Data 2000                                                                                                                                                                                                                                                                     | United States | 2000      |                                                    |
| US Hospital Data 2010                                                                                                                                                                                                                                                                     | United States | 2010      |                                                    |
| US Hospital Data 2012                                                                                                                                                                                                                                                                     | United States | 2012      |                                                    |
